# Supplementary material for: Insulin sensitivity variations in apparently healthy Arab male subjects: correlation with insulin and C peptide
Source: PubMed Central journal article supplement — BMJ Open Diabetes Res Care. 2021 Nov 16;9(2):e002039. doi: 10.1136/bmjdrc-2020-002039 (PMC8596034; doi:10.1136/bmjdrc-2020-002039), 2021-11-16
Supplement: bmjdrc-2020-002039supp001.pdf [file bmjdrc-2020-002039supp001.pdf]

**Supplementary table 1:**

Pearson correlations of CRP with whole-body glucose disposal rate (M value).

|                                        | CRP    |       |
|----------------------------------------|--------|-------|
|                                        | r      | p     |
| M value (Combined group)               | -0.329 | 0.013 |
| M value (least sensitive group)        | -0.288 | 0.317 |
| M value (Intermediate sensitive group) | -0.177 | 0.367 |
| M value (Most sensitive group)         | -0.146 | 0.575 |
